# Supplementary material for: The Impact of Movement Behaviors on Bone Health in Elderly with Adequate Nutritional Status: Compositional Data Analysis Depending on the Frailty Status
Source: PubMed Central journal article supplement (PMC6472191; doi:10.3390/nu11030582), 2019-03-09
Supplement: nutrients-11-00582-s001.pdf [file nutrients-11-00582-s001.pdf]

**Supplementary Table S1.** Geometric means for SB, LPA and MVPA in minutes/day and percentage of waking hours dividing by frailty status and sex.

| Sample            | Robust |       |      | Pre-frailty |       |      | Frailty |       |      |
|-------------------|--------|-------|------|-------------|-------|------|---------|-------|------|
|                   | SB     | LPA   | MVPA | SB          | LPA   | MVPA | SB      | LPA   | MVPA |
| Minutes/day       |        |       |      |             |       |      |         |       |      |
| Whole Sample      | 439.4  | 335.6 | 28.5 | 472.2       | 298.6 | 19.0 | 496.2   | 282.4 | 9.2  |
| Men               | 462.5  | 308.6 | 37.3 | 479.5       | 272.4 | 23.5 | 541.5   | 224.0 | 9.6  |
| Women             | 419.4  | 359.0 | 20.8 | 465.7       | 322.2 | 15.0 | 459.0   | 330.1 | 8.9  |
| % of waking hours |        |       |      |             |       |      |         |       |      |
| Whole Sample      | 54.8   | 41.7  | 3.5  | 60.0        | 37.6  | 2.4  | 63.7    | 35.2  | 1.1  |
| Men               | 57.4   | 38.1  | 4.5  | 62.1        | 34.9  | 3.0  | 70.6    | 28.2  | 1.2  |
| Women             | 52.6   | 44.8  | 2.6  | 58.2        | 40.0  | 1.8  | 58.0    | 41.0  | 1.0  |

SB, sedentary behavior; LPA, light intensity physical activity; MVPA, moderate-to-vigorous intensity physical activity.

**Supplementary Table S2.** Pair-wise log-ratio matrix for SB, LPA and MVPA by frailty status and sex.

| Sample       | Robust older people |       |       | Pre-frailty older people |       |       | Frailty older people |       |       |
|--------------|---------------------|-------|-------|--------------------------|-------|-------|----------------------|-------|-------|
|              | SB                  | LPA   | MPA   | SB                       | LPA   | MVPA  | SB                   | LPA   | MVPA  |
| Whole sample |                     |       |       |                          |       |       |                      |       |       |
| SB           | 0                   | 0.119 | 1.195 | 0                        | 0.203 | 1.398 | 0                    | 0.258 | 1.763 |
| LPA          | 0.119               | 0     | 1.076 | 0.203                    | 0     | 1.195 | 0.258                | 0     | 1.505 |
| MVPA         | 1.195               | 1.076 | 0     | 1.398                    | 1.195 | 0     | 1.763                | 1.505 | 0     |
| Men          |                     |       |       |                          |       |       |                      |       |       |
| SB           | 0                   | 0.178 | 1.106 | 0                        | 0.250 | 1.316 | 0                    | 0.399 | 1.770 |
| LPA          | 0.178               | 0     | 0.928 | 0.250                    | 0     | 1.066 | 0.399                | 0     | 1.371 |
| MVPA         | 1.106               | 0.928 | 0     | 1.316                    | 1.066 | 0     | 1.770                | 1.371 | 0     |
| Women        |                     |       |       |                          |       |       |                      |       |       |
| SB           | 0                   | 0.070 | 1.306 | 0                        | 0.163 | 1.510 | 0                    | 0.151 | 1.763 |
| LPA          | 0.070               | 0     | 1.236 | 0.163                    | 0     | 1.347 | 0.151                | 0     | 1.613 |
| MVPA         | 1.306               | 1.236 | 0     | 1.510                    | 1.347 | 0     | 1.763                | 1.613 | 0     |

SB, sedentary behavior; LPA, light intensity physical activity; MVPA, moderate-to-vigorous intensity physical activity. Note: A value close to zero implies that the times spent in the two behaviors involved in the ratio (arranged by rows and columns) are highly proportional.

**Supplementary Table S3.** Compositional behavior model for bone mass variables for the proportion of the waking hours of day spent in SB, LPA and MVPA for frail older people (a), frail older men (b) and frail older women (c).

a.

| OUTCOME    | MODEL   | $\gamma$ SB | P-VALUE | $\gamma$ LPA | P-VALUE | $\gamma$ MVPA | P-VALUE |
|------------|---------|-------------|---------|--------------|---------|---------------|---------|
|            | P-VALUE |             |         |              |         |               |         |
| BMC VALUES |         |             |         |              |         |               |         |

|                                               |       |         |       |         |       |        |       |
|-----------------------------------------------|-------|---------|-------|---------|-------|--------|-------|
| Whole body                                    | 0.797 | 0.681   | 0.988 | -15.421 | 0.774 | 14.740 | 0.514 |
| Arms (mean)                                   | 0.306 | -17.151 | 0.164 | 15.217  | 0.264 | 1.934  | 0.667 |
| Legs (mean)                                   | 0.714 | -14.804 | 0.491 | 19.676  | 0.425 | -4.872 | 0.606 |
| Lumbar (mean L <sub>1</sub> -L <sub>4</sub> ) | 0.125 | 1.601   | 0.173 | -0.979  | 0.449 | -0.622 | 0.172 |
| Femoral neck                                  | 0.356 | -0.384  | 0.366 | 0.582   | 0.225 | -0.198 | 0.219 |

BMD VALUES

|                                               |       |        |       |        |       |        |       |
|-----------------------------------------------|-------|--------|-------|--------|-------|--------|-------|
| Whole body                                    | 0.392 | 0.015  | 0.378 | -0.025 | 0.224 | 0.010  | 0.241 |
| Arms (mean)                                   | 0.813 | -0.004 | 0.846 | 0.008  | 0.695 | -0.005 | 0.538 |
| Legs (mean)                                   | 0.843 | 0.003  | 0.955 | 0.009  | 0.867 | -0.012 | 0.575 |
| Lumbar (mean L <sub>1</sub> -L <sub>4</sub> ) | 0.222 | 0.015  | 0.812 | 0.027  | 0.706 | -0.043 | 0.102 |
| Femoral neck                                  | 0.713 | -0.014 | 0.486 | 0.019  | 0.431 | -0.004 | 0.590 |

b.

| OUTCOME | MODEL<br>P-<br>VALUE | $\gamma$ SB | P-<br>VALUE | $\gamma$ LPA | P-<br>VALUE | $\gamma$ MVPA | P-<br>VALUE |
|---------|----------------------|-------------|-------------|--------------|-------------|---------------|-------------|
|---------|----------------------|-------------|-------------|--------------|-------------|---------------|-------------|

BMC VALUES

|                                               |       |         |       |         |       |        |       |
|-----------------------------------------------|-------|---------|-------|---------|-------|--------|-------|
| Whole body                                    | 0.710 | -165.97 | 0.434 | 214.950 | 0.443 | -48.97 | 0.664 |
| Arms (mean)                                   | 0.906 | -7.404  | 0.828 | 3.278   | 0.940 | 4.126  | 0.807 |
| Legs (mean)                                   | 0.849 | -7.624  | 0.894 | -4.692  | 0.949 | 12.316 | 0.666 |
| Lumbar (mean L <sub>1</sub> -L <sub>4</sub> ) | 0.551 | 0.966   | 0.626 | -0.218  | 0.931 | -0.748 | 0.473 |
| Femoral neck                                  | 0.506 | -0.780  | 0.264 | 0.973   | 0.278 | -0.193 | 0.560 |

BMD VALUES

|                                               |       |        |       |       |       |        |       |
|-----------------------------------------------|-------|--------|-------|-------|-------|--------|-------|
| Whole body                                    | 0.411 | -0.120 | 0.204 | 0.150 | 0.224 | -0.030 | 0.522 |
| Arms (mean)                                   | 0.721 | -0.054 | 0.471 | 0.055 | 0.563 | -0.001 | 0.971 |
| Legs (mean)                                   | 0.493 | -0.161 | 0.269 | 0.174 | 0.344 | -0.014 | 0.839 |
| Lumbar (mean L <sub>1</sub> -L <sub>4</sub> ) | 0.900 | -0.009 | 0.95  | 0.046 | 0.818 | -0.037 | 0.670 |
| Femoral neck                                  | 0.425 | -0.090 | 0.249 | 0.127 | 0.210 | -0.037 | 0.325 |

c.

| OUTCOME | MODEL<br>P-<br>VALUE | $\gamma$ SB | P-<br>VALUE | $\gamma$ LPA | P-<br>VALUE | $\gamma$ MVPA | P-<br>VALUE |
|---------|----------------------|-------------|-------------|--------------|-------------|---------------|-------------|
|---------|----------------------|-------------|-------------|--------------|-------------|---------------|-------------|

BMC VALUES

|                                               |              |                |              |                |              |                |              |
|-----------------------------------------------|--------------|----------------|--------------|----------------|--------------|----------------|--------------|
| Whole body                                    | 0.121        | -437.74        | 0.054        | <b>486.210</b> | <b>0.050</b> | -48.48         | 0.191        |
| Arms (mean)                                   | 0.474        | -15.826        | 0.266        | 18.088         | 0.246        | -2.262         | 0.392        |
| Legs (mean)                                   | <b>0.014</b> | <b>-88.044</b> | <b>0.014</b> | <b>105.066</b> | <b>0.008</b> | <b>-17.021</b> | <b>0.019</b> |
| Lumbar (mean L <sub>1</sub> -L <sub>4</sub> ) | 0.983        | 0.343          | 0.871        | -0.398         | 0.863        | 0.055          | 0.891        |
| Femoral neck                                  | 0.164        | -0.934         | 0.463        | 1.423          | 0.313        | -0.489         | 0.065        |

BMD VALUES

|                                               |              |               |              |              |              |               |              |
|-----------------------------------------------|--------------|---------------|--------------|--------------|--------------|---------------|--------------|
| Whole body                                    | <b>0.051</b> | -0.124        | 0.172        | <i>0.169</i> | <i>0.094</i> | <b>-0.045</b> | <b>0.020</b> |
| Arms (mean)                                   | 0.226        | 0.034         | 0.340        | -0.027       | 0.476        | -0.007        | 0.320        |
| Legs (mean)                                   | <b>0.010</b> | -0.078        | 0.299        | <i>0.142</i> | <i>0.093</i> | <b>-0.064</b> | <b>0.003</b> |
| Lumbar (mean L <sub>1</sub> -L <sub>4</sub> ) | 0.552        | -0.162        | 0.295        | 0.179        | 0.290        | -0.016        | 0.567        |
| Femoral neck                                  | <b>0.015</b> | <b>-0.303</b> | <b>0.005</b> | <b>0.336</b> | <b>0.005</b> | -0.032        | 0.064        |

All models are adjusted for age, gender, education, marital status, income, BMI, fat mass, lean mass, alcohol intake, smoking, thyroid disease, arthritis and calcium, by backward elimination (with predictor retained if  $p < 0.2$ ). Statistically significant associations ( $p < 0.05$ ) are highlighted in bold and the trends are in italics. SB, sedentary behavior; LPA, light intensity physical activity; MVPA, moderate-to-vigorous intensity physical activity; BMC, bone mineral content; BMD, bone mineral density.
